# Supplementary material for: MafB-restricted local monocyte proliferation precedes lung interstitial macrophage differentiation
Source: PubMed Central journal article supplement (PMC10154211; doi:10.1038/s41590-023-01468-3), 2023-03-16
Supplement: 41590_2023_1468_MOESM1_ESM.pdf [file 41590_2023_1468_MOESM1_ESM.pdf]

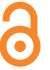

---

# **MafB-restricted local monocyte proliferation precedes lung interstitial macrophage differentiation**

---

In the format provided by the authors and unedited

---

## **Table of contents**

### **Supplementary Tables**

Supplementary Table 1. List of reagents, antibodies and commercial assays used in this study.

Supplementary Table 2. List of the deposited data generated and used in this study.

## Supplementary Tables

Supplementary Table 1. List of reagents, antibodies and commercial assays used in this study.

| Antibodies                                                                                   | Source                    | Cat. Number |
|----------------------------------------------------------------------------------------------|---------------------------|-------------|
| Anti-Cre Recombinase Monoclonal Antibody (Rabbit, clone D7L7L), unconjugated                 | Cell Signaling Technology | 15036       |
| Anti-mouse C1qA Monoclonal Antibody (Mouse, clone JL-1), biotin conjugated                   | Bio-technie               | NBP1-51140B |
| Anti-mouse CD3 Monoclonal Antibody (Rat, clone 17A2), eFluor450 conjugated                   | ThermoFisher              | 48-0032-82  |
| Anti-mouse CD3e Monoclonal Antibody (Armenian Hamster, clone 145-2C11), PE conjugated        | BD Biosciences            | 553064      |
| Anti-mouse CD11b Monoclonal Antibody (Rat, clone M1/70), APC conjugated                      | ThermoFisher              | 17-0112-82  |
| Anti-mouse CD11b Monoclonal Antibody (Rat, clone M1/70), BUV395 conjugated                   | BD Biosciences            | 563553      |
| Anti-mouse CD11b Monoclonal Antibody (Rat, clone M1/70), BUV563 conjugated                   | BD Biosciences            | 741242      |
| Anti-mouse CD11b Monoclonal Antibody (Rat, clone M1/70), FITC conjugated                     | BD Biosciences            | 557396      |
| Anti-mouse CD11b Monoclonal Antibody (Rat, clone M1/70), PE-Cy7 conjugated                   | BD Biosciences            | 552850      |
| Anti-mouse CD11c Monoclonal Antibody (Hamster, clone HL3), BV786 conjugated                  | BD Biosciences            | 563735      |
| Anti-mouse CD16/32 (Mouse BD Fc Block™) Monoclonal Antibody (Rat, clone 2.4G2), unconjugated | BD Biosciences            | 553142      |
| Anti-mouse CD16/32 Monoclonal Antibody (Rat, clone 2.4G2), APC-Cy7 conjugated                | BD Biosciences            | 560541      |
| Anti-mouse CD19 Monoclonal Antibody (Rat, clone 1D3), PE conjugated                          | BD Biosciences            | 553786      |
| Anti-mouse CD31 Monoclonal Antibody (Rat, clone 390), APC conjugated                         | ThermoFisher              | 17-0311-82  |
| Anti-mouse CD34 Monoclonal Antibody (Rat, clone SA376A4), BV421 conjugated                   | BioLegend                 | 152207      |
| Anti-mouse CD45.1 Monoclonal Antibody (Mouse, clone A20), BUV395 conjugated                  | BD Biosciences            | 565212      |
| Anti-mouse CD45.1 Monoclonal Antibody (Mouse, clone A20), BV510 conjugated                   | BD Biosciences            | 565278      |
| Anti-mouse CD45.2 Monoclonal Antibody (Mouse, clone 104), BUV395 conjugated                  | BD Biosciences            | 564616      |
| Anti-mouse CD45.2 Monoclonal Antibody (Mouse, clone 104), FITC conjugated                    | BD Biosciences            | 561874      |
| Anti-mouse CD45.2 Monoclonal Antibody (Mouse, clone 104), PE-Cy7 conjugated                  | BD Biosciences            | 560696      |

|                                                                                                  |                    |            |
|--------------------------------------------------------------------------------------------------|--------------------|------------|
| Anti-mouse CD45.2 Monoclonal Antibody (Mouse, clone 104), PerCP-Cy5.5 conjugated                 | BD Biosciences     | 552950     |
| Anti-mouse CD45.2 Monoclonal Antibody (Mouse, clone 104), V500 conjugated                        | BD Biosciences     | 562129     |
| Anti-mouse CD64 Monoclonal Antibody (Mouse, clone X54-5/7.1), BV421 conjugated                   | BioLegend          | 139309     |
| Anti-mouse CD115 (CSF1R) Monoclonal Antibody (Rat, clone AFS98), unconjugated                    | Bio X Cell         | BE0213     |
| Anti-mouse CD115 (CSF1R) Monoclonal Antibody (Rat, clone AFS98), APC conjugated                  | ThermoFisher       | 17-1152-82 |
| Anti-mouse CD115 (CSF1R) Monoclonal Antibody (Rat, clone AFS98), PerCP-Cy5.5 conjugated          | BioLegend          | 135526     |
| Anti-mouse CD117 (c-Kit) Monoclonal Antibody (Rat, 2B8), BV786 conjugated                        | BD Biosciences     | 564012     |
| Anti-mouse CD117 (c-Kit) Monoclonal Antibody (Rat, 2B8), PE conjugated                           | BioLegend          | 105807     |
| Anti-mouse CD135 (Flt3) Monoclonal Antibody (Rat, clone A2F10), PE conjugated                    | ThermoFisher       | 12-1351-82 |
| Anti-mouse CD170 (SiglecF) Monoclonal Antibody (Rat, clone E50-2440), PE conjugated              | BD Biosciences     | 552126     |
| Anti-mouse CD170 (SiglecF) Monoclonal Antibody (Rat, clone E50-2440), PE-CF594 conjugated        | BD Biosciences     | 562757     |
| Anti-mouse CD172a (SIRPa) Monoclonal Antibody (Rat, clone P84), APC conjugated                   | BioLegend          | 144013     |
| Anti-mouse CD206 (MMR) Monoclonal Antibody (Rat, clone C068C2), AF647 conjugated                 | BioLegend          | 141712     |
| Anti-mouse CD206 (MMR) Monoclonal Antibody (Rat, clone C068C2), AF647 conjugated                 | BioLegend          | 141712     |
| Anti-mouse CD206 (MMR) Monoclonal Antibody (Rat, clone C068C2), PE-Cy7 conjugated                | BioLegend          | 141719     |
| Anti-mouse cMaf Monoclonal Antibody (Mouse, clone sym0F1), PE conjugated                         | ThermoFisher       | 12-9855-42 |
| Anti-mouse F4/80 Monoclonal Antibody (Rat, BM8), BV650 conjugated                                | BioLegend          | 123149     |
| Anti-mouse F4/80 Monoclonal Antibody (Rat, BM8), FITC conjugated                                 | BioLegend          | 123108     |
| Anti-mouse F4/80 Monoclonal Antibody (Rat, BM8), PE conjugated                                   | Sony Biotechnology | 1215550    |
| Anti-mouse FcεRIα (MAR-1) Monoclonal Antibody (Armenian Hamster, clone MAR-1), PE-Cy7 conjugated | BioLegend          | 134317     |
| Anti-mouse I-A/I-E (MHC-II) Monoclonal Antibody (Rat, clone M5/114.15.2), unconjugated           | ThermoFisher       | 56-5321-82 |

|                                                                                                  |                          |            |
|--------------------------------------------------------------------------------------------------|--------------------------|------------|
| Anti-mouse I-A/I-E (MHC-II) Monoclonal Antibody (Rat, clone M5/114.15.2), AF700 conjugated       | ThermoFisher             | 56-5321-80 |
| Anti-mouse I-A/I-E (MHC-II) Monoclonal Antibody (Rat, clone M5/114.15.2), PerCP-Cy5.5 conjugated | Sony Biotechnology       | 1138125    |
| Anti-mouse Ki-67 Monoclonal Antibody (Rat, clone SolA15), eFluor570 conjugated                   | ThermoFisher             | 41-5698-82 |
| Anti-mouse Ki-67 Monoclonal Antibody (Rat, clone SolA15), PerCP-eFluor710 conjugated             | ThermoFisher             | 46-5698-80 |
| Anti-mouse Ly6A/E Monoclonal Antibody (Rat, clone D7), PE-Cy7 conjugated                         | BD Biosciences           | 561021     |
| Anti-mouse Ly6C Monoclonal Antibody (Rat, clone HK1.4), AF700 conjugated                         | BioLegend                | 128024     |
| Anti-mouse Ly6C Monoclonal Antibody (Rat, clone AL-21), PE-CF594 conjugated                      | BD Biosciences           | 562728     |
| Anti-mouse Ly6G Monoclonal Antibody (Rat, clone 1A8), APC conjugated                             | BD Biosciences           | 560599     |
| Anti-mouse Ly6G Monoclonal Antibody (Rat, clone 1A8), FITC conjugated                            | BD Biosciences           | 551461     |
| Anti-mouse Ly6G Monoclonal Antibody (Rat, clone 1A8), PE conjugated                              | BD Biosciences           | 551461     |
| Anti-mouse Ly6G Monoclonal Antibody (Rat, clone 1A8), PE-Cy7 conjugated                          | BD Biosciences           | 560601     |
| Anti-mouse Ly6G Monoclonal Antibody (Rat, clone 1A8), PerCP-Cy5.5 conjugated                     | BioLegend                | 127615     |
| Anti-mouse MafB Recombinant Monoclonal Antibody (Rabbit, clone BLR046F), unconjugated            | Bethyl Laboratories Inc. | A700-046   |
| Anti-mouse MerTK Monoclonal Antibody (Rat, clone DS5MMER), PE-Cy7 conjugated                     | ThermoFisher             | 25-5751-80 |
| Anti-mouse XCR-1 Monoclonal Antibody (Mouse, clone ZET), APC-Cy7 conjugated                      | BioLegend                | 148223     |
| Anti-rabbit IgG (H+L) Cross-Adsorbed Secondary Polyclonal Antibody (Goat), AF488 conjugated      | ThermoFisher             | A-11008    |
| Anti-rabbit IgG (H+L) Cross-Adsorbed Secondary Polyclonal Antibody (Goat), AF647 conjugated      | ThermoFisher             | A-21244    |
| Anti-rat IgG (H+L) Cross-Adsorbed Secondary Polyclonal Antibody (Donkey), AF594 conjugated       | ThermoFisher             | A-21209    |
| Anti-trinitrophenol (isotype control) Monoclonal Antibody (Rat, 2A3), unconjugated               | Bio X Cell               | BE0089     |
| TotalSeq™-A0305 anti-mouse Hashtag 5 Antibody                                                    | BioLegend                | 155809     |
| TotalSeq™-A0306 anti-mouse Hashtag 6 Antibody                                                    | BioLegend                | 155811     |
| TotalSeq™-A0307 anti-mouse Hashtag 7 Antibody                                                    | BioLegend                | 155813     |

|                                                                |                          |                    |
|----------------------------------------------------------------|--------------------------|--------------------|
| TotalSeq™-A0308 anti-mouse Hashtag 8 Antibody                  | BioLegend                | 155815             |
| <b>Chemicals, Peptides and Recombinant Proteins</b>            | <b>Source</b>            | <b>Cat. Number</b> |
| 1,4 Dithiothreitol (DTT)                                       | Sigma                    | 10197777001        |
| 5-Ethynyl-2'-deoxyuridine (EdU)                                | Santa Cruz Biotechnology | sc-284628          |
| Baytrill (enrofloxacin)                                        | Bayer                    | 616300             |
| Bovine Serum Albumin (BSA)                                     | Sigma                    | A7906              |
| Brilliant Stain Buffer                                         | BD Bioscience            | 563794             |
| Collagenase A, from <i>Clostridium histolyticum</i>            | Sigma                    | 11088793001        |
| Collagenase IV                                                 | ThermoFisher             | 17104019           |
| cOmplete™ Protease Inhibitor Cocktail                          | Sigma                    | 11697498001        |
| Diphtheria Toxin (DT), from <i>Corynebacterium diphtheriae</i> | List Biological Labs     | 150                |
| DAPI                                                           | Biolegend                | 422801             |
| DNase I                                                        | Sigma                    | 11284932001        |
| dNTP                                                           | ThermoFisher             | N8080260           |
| Donkey serum                                                   | Sigma                    | D9663              |
| DPBS                                                           | ThermoFisher             | 14190094           |
| EDTA                                                           | Merck Millipore          | 1084181000         |
| Fetal Bovine Serum (FBS)                                       | ThermoFisher             | 10270098           |
| Glycerol                                                       | ThermoFisher             | 158920025          |
| GoTaq G2 Hot Start Taq Polymerase                              | Promega                  | M7401              |
| HBSS with Phenol Red                                           | Lonza                    | BE10-508F          |
| IsoFlo (Isoflurane)                                            | Zoetis                   | B506               |
| KAPA Express Extract                                           | Merck                    | KK7100             |
| Methanol                                                       | Merck                    | 67-56-1            |
| Nimatek (Ketamine)                                             | Dechra                   | 804132             |
| Nonidet P 40 Substitute                                        | Sigma                    | 74385              |
| O.C.T. Compound                                                | Tissue-Tek               | 4583               |
| Paraformaldehyde                                               | ThermoFisher             | F/1501/PB15        |
| Percoll                                                        | GE Healthcare            | 17089101           |
| Pexidartinib (PLX-3397)                                        | MedChemExpress           | HY-16749           |
| Poly(ethylene glycol), average Mn 400                          | Sigma                    | 202398             |
| ProLong Antifade Mountant                                      | ThermoFisher             | P36961             |
| Quant-iT™ RiboGreen™ RNA Assay Kit                             | ThermoFisher             | R11490             |
| Rompun (Xylazine)                                              | Bayer                    | 0076901            |
| Sucrose                                                        | Merck                    | 57-50-1            |
| Streptavidin, PE conjugated                                    | BD Biosciences           | 554061             |
| SYTOX Blue Nucleic Acid Stain                                  | ThermoFisher             | S11348             |
| Tris(hydroxymethyl)aminomethane                                | Merck Millipore          | 108382             |
| TRIzol Reagent                                                 | ThermoFisher             | 10296010           |
| Triton X-100                                                   | Merck                    | 648466             |
| Truseq Stranded mRNA kit                                       | Illumina                 | 20020594           |
| Tween-20                                                       | ThermoFisher             | 233360010          |
| Tween-80                                                       | Sigma                    | P1754              |
| G418                                                           | ThermoFisher             | 10131027           |
| UltraPure BSA                                                  | ThermoFisher             | AM2616             |
| <b>Commercial Assays</b>                                       | <b>Source</b>            | <b>Cat. Number</b> |

|                                                                              |                 |             |
|------------------------------------------------------------------------------|-----------------|-------------|
| APC Mouse Lineage Antibody Cocktail, with Isotype Control                    | BD Bioscience   | 558074      |
| CD11b MicroBeads, human and mouse                                            | Miltenyi Biotec | 130-049-601 |
| Chromium Next GEM Single Cell 3' GEM, Library & Gel Bead Kit v3.1            | 10X Genomics    | 1000128     |
| CD11b MicroBeads, human and mouse                                            | Miltenyi Biotec | 130-049-601 |
| Chromium Next GEM Single Cell 3' GEM, Library & Gel Bead Kit v3.1            | 10X Genomics    | 1000128     |
| Chromium Next GEM Chip G Single Cell Kit                                     | 10X Genomics    | 1000120     |
| Click-iT™ Plus EdU Alexa Fluor™ 488 Flow Cytometry Assay Kit                 | ThermoFisher    | 10632       |
| FITC Mouse Anti-Ki-67 Set                                                    | BD Bioscience   | 556026      |
| LIVE/DEAD™ Fixable Near-IR Dead Cell Stain Kit, for 633 or 635 nm excitation | Invitrogen      | L34976      |
| MCP-1/CCL2 Mouse Uncoated ELISA Kit                                          | ThermoFisher    | 88-7391-88  |
| Monocyte Isolation Kit (BM), mouse                                           | Miltenyi Biotec | 130-100-629 |
| Pierce™ BCA Protein Assay Kit                                                | ThermoFisher    | 23225       |
| Single Index Kit T Set A                                                     | 10X Genomics    | 1000213     |
| NovaSeq 6000 S1 Reagent Kit v1.5 (100 cycles)                                | Illumina        | 20028319    |

Supplementary Table 2. List of the deposited data generated and used in this study.

| Bulk RNA-seq data                                                                                                  | Source        | Identifier                                                                       |
|--------------------------------------------------------------------------------------------------------------------|---------------|----------------------------------------------------------------------------------|
| Raw and analyzed RNA-seq data                                                                                      | This paper    | GEO: GSE194021                                                                   |
| scRNA-seq data                                                                                                     | Source        | Identifier                                                                       |
| Raw and analyzed scRNA-seq data                                                                                    | This paper    | GEO: GSE194021                                                                   |
| Lung IM and classical monocytes                                                                                    | <sup>19</sup> | EMBL-EBI: E-MTAB-7678                                                            |
| Microarray data                                                                                                    | Source        | Identifier                                                                       |
| Classical Monocytes MHCII <sup>+</sup> in blood                                                                    | ImmGen        | GEO: GSM605868, GSM605870, GSM605871                                             |
| Classical Monocytes MHCII <sup>-</sup> in bone marrow                                                              | ImmGen        | GEO: GSM854329, GSM854330, GSM854331                                             |
| Classical Monocytes MHCII <sup>-</sup> in blood                                                                    | ImmGen        | GEO: GSM605872, GSM605873, GSM605874                                             |
| Nonclassical Monocytes, MHCII <sup>+</sup>                                                                         | ImmGen        | GEO: GSM605878, GSM605879                                                        |
| Nonclassical Monocytes in bone marrow                                                                              | ImmGen        | GEO: GSM854332, GSM854333, GSM854334                                             |
| Nonclassical Monocytes in blood                                                                                    | ImmGen        | GEO: GSM605884, GSM605885                                                        |
| Nonclassical Monocytes, MHCII <sup>int</sup>                                                                       | ImmGen        | GEO: GSM605886, GSM605887, GSM605888, GSM605889, GSM605890                       |
| Lung CD11b <sup>+</sup> CD24 <sup>-</sup> macrophages                                                              | ImmGen        | GEO: GSM854271, GSM854272                                                        |
| Small Intestinal Lamina Propria CD11c <sup>hi</sup> CD103 <sup>-</sup> CD11b <sup>+</sup> macrophages              | ImmGen        | GEO: GSM854262, GSM854263, GSM854264, GSM854265, GSM854266, GSM854267, GSM854268 |
| Bone marrow macrophages                                                                                            | ImmGen        | GEO: GSM854317, GSM854318, GSM854319                                             |
| Spleen Red Pulp macrophages                                                                                        | ImmGen        | GEO: GSM605853, GSM605854, GSM605855                                             |
| Peritoneal macrophage steady state                                                                                 | ImmGen        | GEO: GSM854294, GSM854295, GSM854296                                             |
| Peritoneal cavity macrophages steady state                                                                         | ImmGen        | GEO: GSM605850, GSM605851, GSM605852                                             |
| Medullary macrophages from skin draining lymph nodes                                                               | ImmGen        | GEO: GSM854322, GSM854323                                                        |
| Central nervous system microglia                                                                                   | ImmGen        | GEO: GSM854326, GSM854327, GSM854328                                             |
| CD103 <sup>+</sup> migratory DC, Mediastinal LN CD103 <sup>+</sup> DC                                              | ImmGen        | GEO: GSM854243, GSM854244, GSM854245                                             |
| CD11b <sup>+</sup> migratory DC, Mediastinal LN CD11b <sup>+</sup> DC                                              | ImmGen        | GEO: GSM854255, GSM854256, GSM854257                                             |
| Lung CD103 <sup>+</sup> dendritic cells                                                                            | ImmGen        | GEO: GSM538231, GSM538232, GSM538233, GSM854241, GSM854242                       |
| Lung MHCII <sup>+</sup> CD11c <sup>+</sup> CD103 <sup>-</sup> CD11b <sup>+</sup> CD24 <sup>+</sup> dendritic cells | ImmGen        | GEO: GSM854269, GSM854270                                                        |
| Lung IM, Ly6C <sup>+</sup> cMo and AM                                                                              | <sup>22</sup> | EMBL-EBI: E-MTAB-5012                                                            |
